# Supplementary material
Source: publisher figshare collection journal article supplement (https://frontiersin.figshare.com/ndownloader/files/15279545)
Supplement: Supplementary file [file 15279545]

**Table S7** The upregulated proteins in both the 10% NaCl group compared with the control group and in the 20% NaCl group compared with the 10% NaCl group.

| Accession Number | Protein Name                                              | Gene Name               | Fold Change |            |
|------------------|-----------------------------------------------------------|-------------------------|-------------|------------|
|                  |                                                           |                         | 10% NaCl ↑  | 20% NaCl ↑ |
| A0A077W129       | 30S ribosomal protein S13                                 | <i>rpsM</i>             | 1.20        | 1.22       |
| A0A0D1FKQ9       | 30S ribosomal protein S9                                  | <i>rpsI</i>             | 1.20        | 1.38       |
| A0A0D1H0K7       | 50S ribosomal protein L23                                 | <i>rplW</i>             | 1.21        | 1.39       |
| A0A0B6XLK3       | Haloacid dehalogenase-like hydrolase                      | <i>ppaX</i>             | 1.22        | 1.56       |
| A0A0D1H8Z3       | 3-oxoacyl-[acyl-carrier-protein] synthase 3               | <i>fabH</i>             | 1.23        | 1.58       |
| A0A0D1HQY5       | Nucleoside diphosphate kinase                             | <i>ndk</i>              | 1.24        | 1.48       |
| A0A0B6XQS8       | Valine-tRNA ligase                                        | <i>valS</i>             | 1.24        | 1.26       |
| A0A0D1I3J5       | Urease accessory protein UreE                             | <i>ureE</i>             | 1.25        | 1.64       |
| A0A0D1HYX5       | 50S ribosomal protein L14                                 | <i>rplN</i>             | 1.25        | 1.65       |
| A0A090N2E5       | Mannitol-specific phosphotransferase enzyme IIA component | <i>mtlF</i>             | 1.28        | 1.62       |
| A0A0D1GWI4       | 50S ribosomal protein L4                                  | <i>rplD</i>             | 1.28        | 1.35       |
| A0A0D1IW07       | Histidine-tRNA ligase                                     | <i>hisS</i>             | 1.29        | 1.61       |
| A0A0D1IHK1       | 50S ribosomal protein L20                                 | <i>rplT</i>             | 1.33        | 1.50       |
| A0A090LYX3       | Inosine-uridine preferring nucleoside hydrolase           | <i>SAU06011_2_40119</i> | 1.42        | 1.43       |
| A0A0D1JWV4       | 50S ribosomal protein L28                                 | <i>rpmB</i>             | 1.55        | 1.65       |
| A0A0D1GP04       | Succinyl-CoA ligase [ADP-forming] subunit alpha           | <i>SAJPND1_01177</i>    | 1.49        | 2.10       |
| A0A0D6GUT4       | Membrane protein                                          | <i>mmpL8</i>            | 1.55        | 2.48       |
| A0A0D1H3E1       | Sced                                                      | <i>SAJPND1_02072</i>    | 1.75        | 4.71       |
| A0A0B6XR64       | Urease subunit beta                                       | <i>ureB</i>             | 1.75        | 3.76       |
| A0A090LXA3       | Lipase/esterase LipA                                      | <i>SAU06011_2_10612</i> | 1.80        | 2.06       |
